# Supplementary material for: Co 3 O 4 undergoes in situ reduction to mediate lignin hydrodeoxygenation under mild conditions with high liquid yield and recyclability
Source: Royal Society of Chemistry journal article supplement (doi:10.1039/d5nj03649f), 2026-01-01
Supplement: d5nj03649f1.pdf [file d5nj03649f1.pdf]

**Co<sub>3</sub>O<sub>4</sub> undergoes in-situ reduction to mediate lignin hydrodeoxygenation under mild conditions with high liquid yield and recyclability**

Chengcheng Liu,<sup>1,2</sup> Shao Lin,<sup>3</sup> Guoheng Wei,<sup>2</sup> Yifan Li,<sup>2</sup> Pan Guo,<sup>2</sup> Ligang Zhang,<sup>2</sup> Cong Wang,<sup>2</sup> Xiaoyan Zhao,<sup>1\*</sup> Dejin Zhang,<sup>2\*</sup> and Jingpei Cao<sup>1</sup>

<sup>1</sup> Jiangsu Province Engineering Research Center of Fine Utilization of Carbon Resources, China University of Mining & Technology, Xuzhou 221116, Jiangsu, China

<sup>2</sup> Anhui Key Laboratory of Spin Electron and Nanomaterials, School of Chemistry and Chemical Engineering, Suzhou University, Suzhou 234000, Anhui, China

<sup>3</sup> Ningxia Baofeng Energy Group Co., Ltd, Yinchuan 750000, Ningxia, China

**Materials.** The reagents used in this experiment are all of analytical grade. Cobalt nitrate hexahydrate (Co(NO<sub>3</sub>)<sub>2</sub>·6H<sub>2</sub>O) and ammonia solution (NH<sub>4</sub>OH, 25~28 wt%) were purchased from Sinopharm Chemical Reagent Co., Ltd, Shanghai, China. CoCO<sub>3</sub> (99.0%) was purchased from Shanghai Haohong Biomedical Technology Co., Ltd. CoO (99.0%), Co(OH)<sub>2</sub> (99.9 %), Co<sub>3</sub>O<sub>4</sub>-Adamas (99.99%) and Co (99.99%) were purchased from Shanghai Adamas Reagent Co., Ltd. CoCl<sub>2</sub>·6H<sub>2</sub>O (99.0%) was purchased from China National Pharmaceutical Group Chemical Reagent Co., Ltd. Co<sub>2</sub>O<sub>3</sub> was purchased from Shanghai Bide Pharmaceutical Technology Co., Ltd. Co<sub>3</sub>O<sub>4</sub>-Aladdin was purchased from Shanghai Jingchun Biochemical Technology Co., Ltd. Co<sub>3</sub>O<sub>4</sub>-J&K Scientific was purchased from Beijing Bailingwei Technology Co., Ltd. Co<sub>3</sub>O<sub>4</sub>-Energy Chemical was purchased from Anhui Zesheng Technology Co., Ltd. Co<sub>3</sub>O<sub>4</sub>-Macklin, diphenyl ether (98 %), 4-phenoxyphenol (99 %), 4,4'-oxydiphenol (99 %), 4,4'-oxybis(methylbenzene) (99 %), anisole (>99.8 %), benzyl ether (97 %), benzyl phenyl ether (98 %), 2-phenoxy-1-phenylethan-1-ol (98 %), 2-phenoxy-1-phenylacetone (98 %), guaiacol (99 %), methylcyclohexane (99 %), toluene (99 %), ethylbenzene (99 %), ethyl cyclohexane (99 %), isopropanol (>99.8 %), cyclohexane (>99.8 %), benzene (>99.8 %), cyclohexanol (>99.8 %), and phenol (>99.8 %), and Eugenol (98 %) were provided from

Shanghai Macklin Biochemical Co., Ltd. Enzymatic hydrolysis lignin from was purchased from Linyi Senhe Biomaterials Co., Ltd. H<sub>2</sub> was purchased from provided by a local company. All of the reagents could be used without further purification.

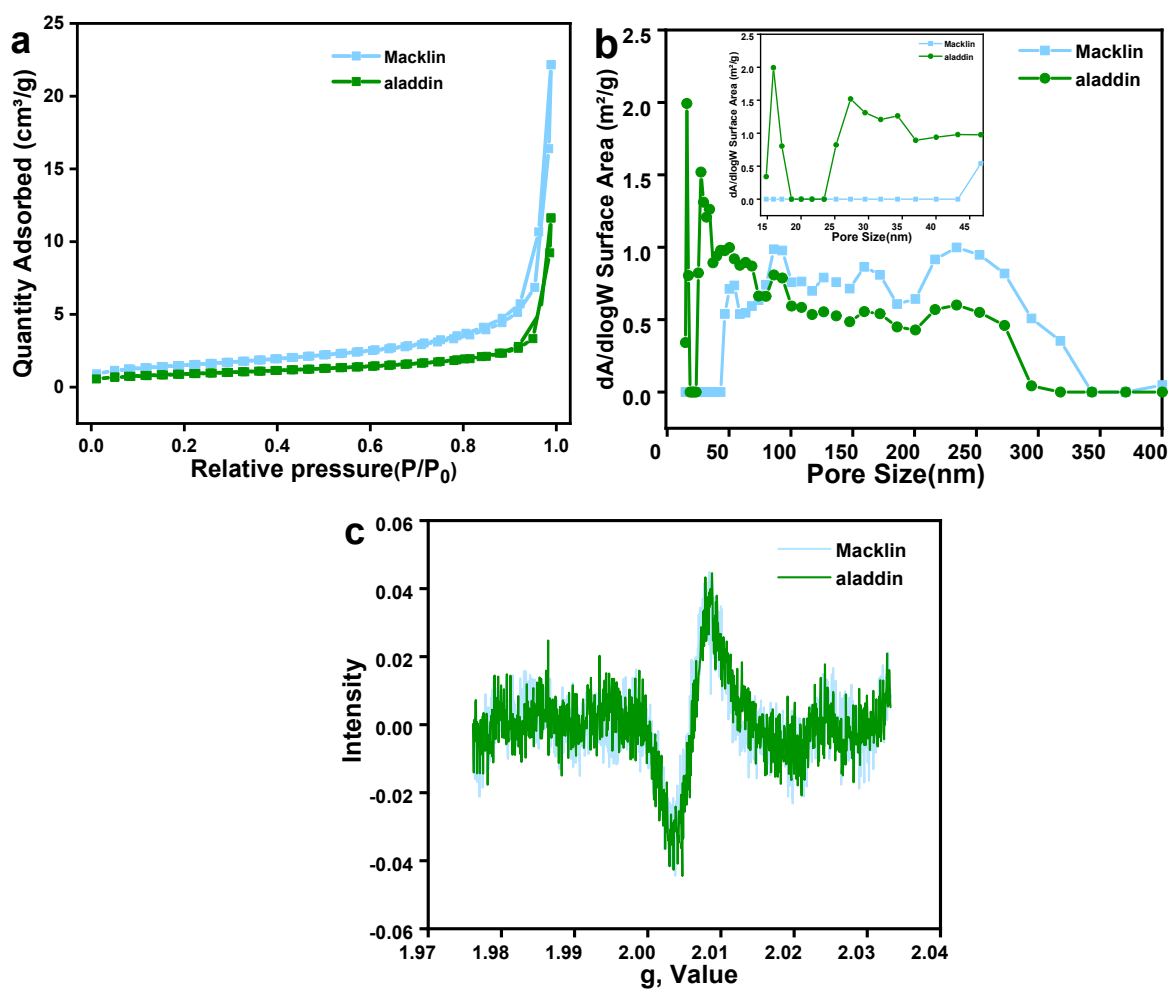

**Figure S1.** (a) N<sub>2</sub> adsorption–desorption isotherms, (b) the pore-size distribution curves, and (c) EPR spectra of Co<sub>3</sub>O<sub>4</sub>-Aladdin and Co<sub>3</sub>O<sub>4</sub>-Macklin.

**Table S1.** Summary of the Cobalt and oxygen functional groups content in Co<sub>3</sub>O<sub>4</sub>-Macklin and Co<sub>3</sub>O<sub>4</sub>-aladdin (determined by XPS).

| Sample                                  | area             |                  | ratio                              | area              |                   | ratio                                |
|-----------------------------------------|------------------|------------------|------------------------------------|-------------------|-------------------|--------------------------------------|
|                                         | Co <sup>3+</sup> | Co <sup>2+</sup> | Co <sup>3+</sup> /Co <sup>2+</sup> | O <sub>surf</sub> | O <sub>latt</sub> | O <sub>surf</sub> /O <sub>latt</sub> |
| Co <sub>3</sub> O <sub>4</sub> -Macklin | 23864            | 119482           | 0.20                               | 60594             | 42734             | 1.42                                 |
| Co <sub>3</sub> O <sub>4</sub> -aladdin | 33190            | 142207           | 0.23                               | 55243             | 37543             | 1.47                                 |

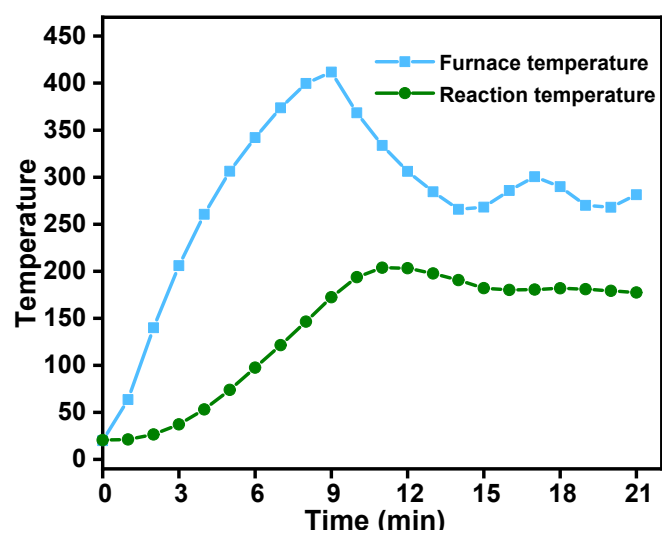

**Figure S2.** Time-dependent dynamic changes of furnace temperature and reaction temperature

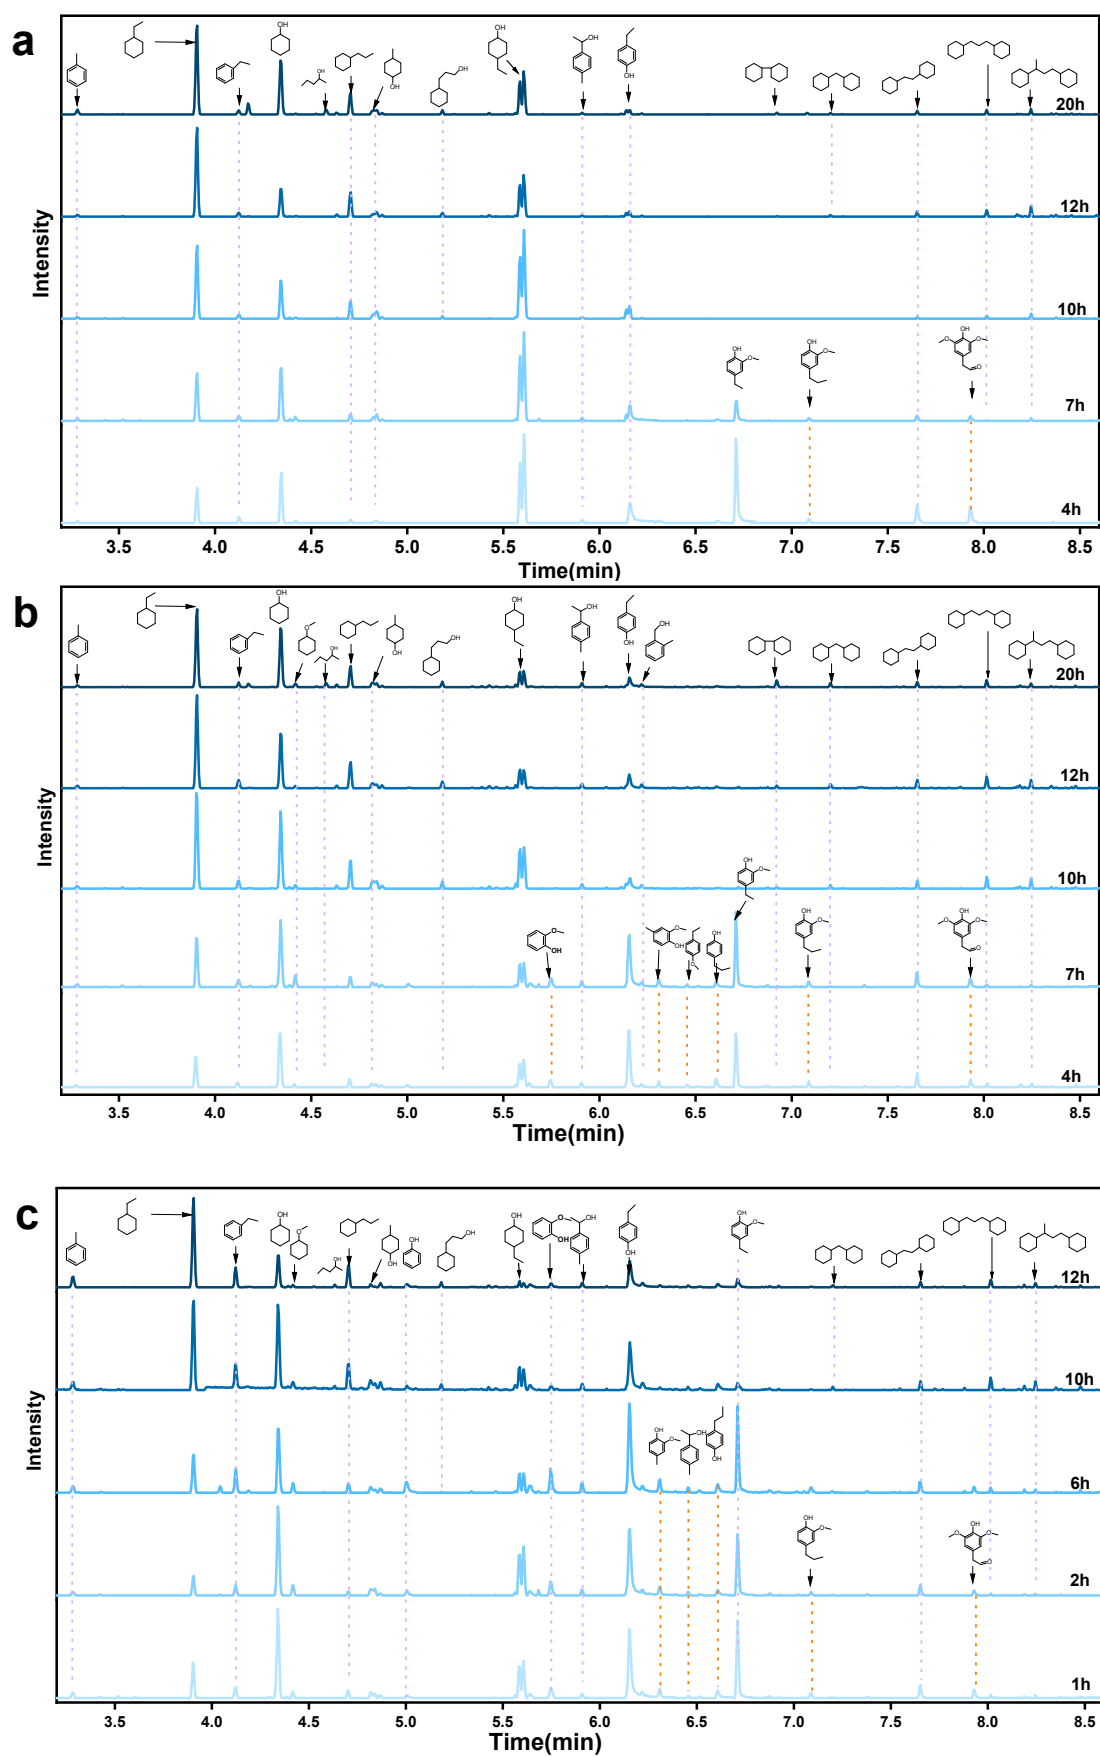

**Figure S3.** Total ion chromatograms of the products from the HDO of enzymatic lignin over  $\text{Co}_3\text{O}_4$  under different temperatures, (a) 220 °C, (b) 240 °C, (c) 260 °C (Reaction condition: 100.0 mg

catalyst, 700 rpm, 1~20 h, and 2MPa H<sub>2</sub> at RT).

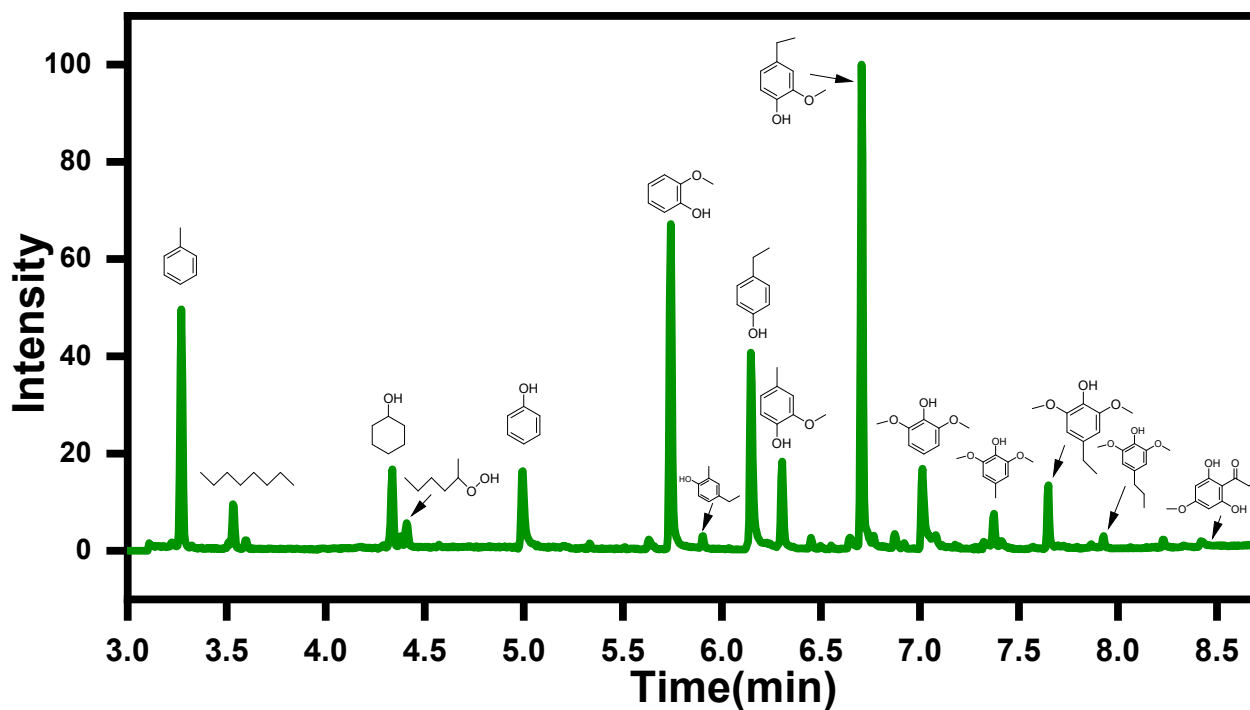

**Figure S4.** Total ion chromatograms of the products from the HDO of enzymatic lignin without Co<sub>3</sub>O<sub>4</sub> Reaction condition: 240 °C, 700 rpm, 10 h, and 2MPa H<sub>2</sub> at RT).

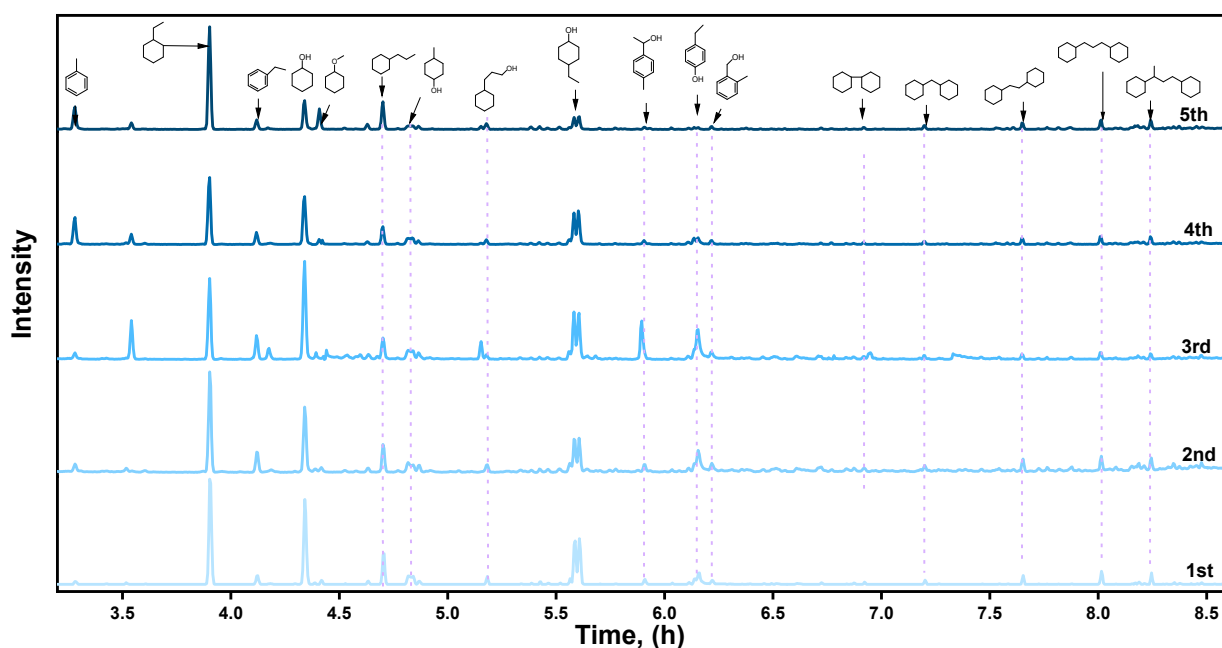

**Figure S5.** Total ion chromatograms of the products from the HDO of enzymatic lignin catalyzed by reused Co<sub>3</sub>O<sub>4</sub>. Reaction conditions: 240 °C, 100.0 mg catalyst, 700 rpm, 10 h, and 2MPa H<sub>2</sub> at RT.

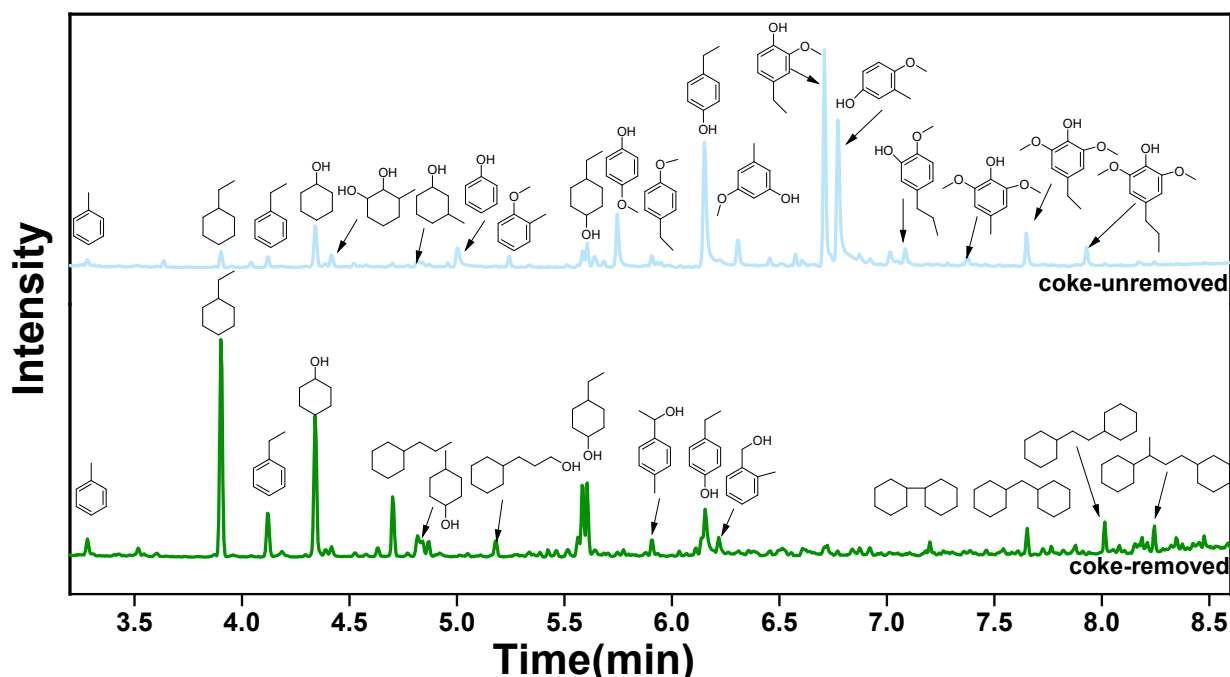

**Figure S6.** Total ion chromatograms of the products from the HDO of enzymatic lignin catalyzed by  $\text{Co}_3\text{O}_4$  (after coke removal and without coke removal) in its second use. Reaction conditions: 240 °C, 100.0 mg catalyst, 700 rpm, 10 h, and 2 MPa  $\text{H}_2$  (initial pressure at RT).

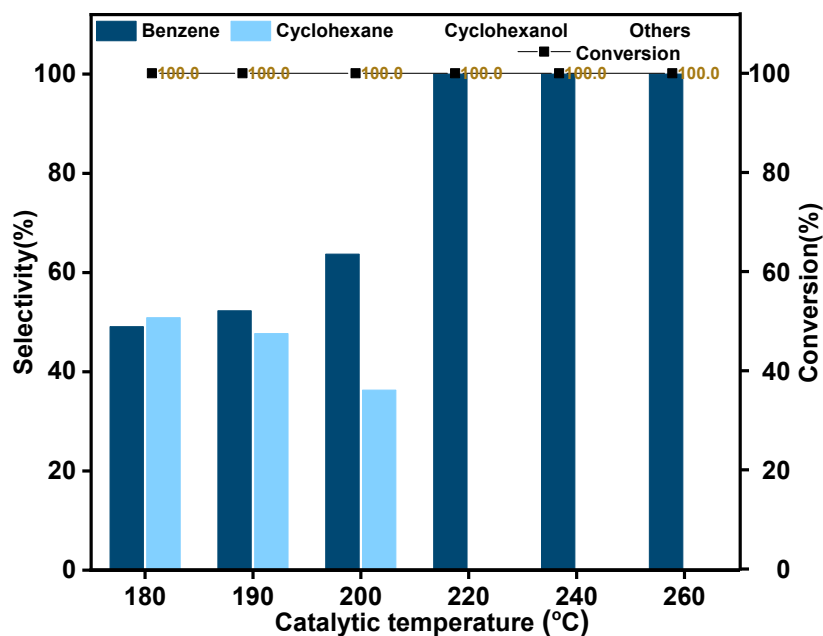

**Figure S7.** The catalytic performance of  $\text{Co}_3\text{O}_4$ -Aladdin under different temperatures. The reaction conditions are as follows: 2 MPa  $\text{H}_2$ , 6h, 5 mL n-heptane.

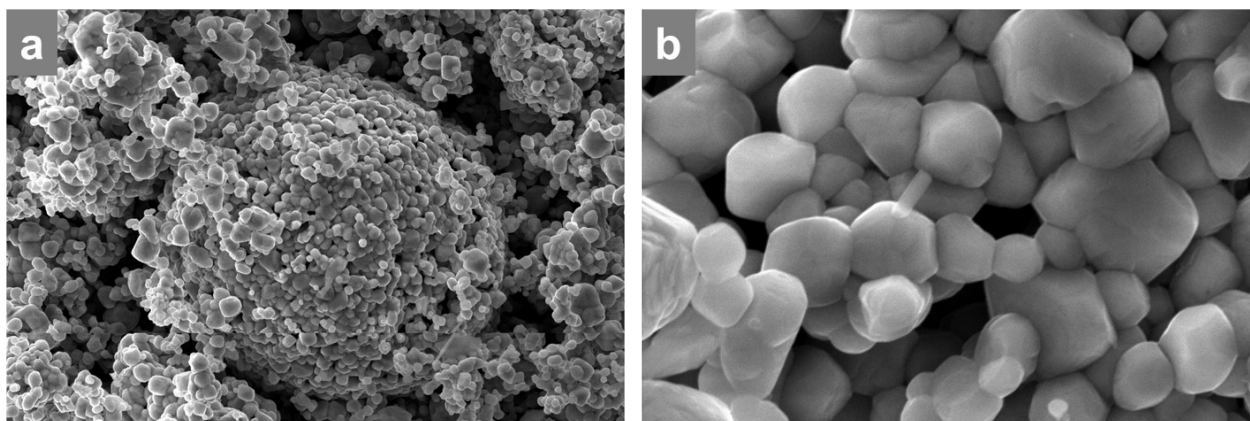

**Figure S8.** SEM images of reused  $\text{Co}_3\text{O}_4$ : (a) low magnification, (b) high magnification.
